# Supplementary material for: Carry-over effects of urban larval environments on the transmission potential of dengue-2 virus
Source: PubMed Central journal article supplement (PMC6050736; doi:10.1186/s13071-018-3013-3), 2018-07-17
Supplement: 13071_2018_3013_MOESM1_ESM.pdf [file 13071_2018_3013_MOESM1_ESM.pdf]

**S1 Table. Effect of temperature within a season.** Model results from GZLMs estimating the effect of temperature within a season. Binomial models were fit with a logit-link function. Except for those models predicting infection metrics and vector competence, site was included as a random effect.

|        |             | $\beta$ | df | $\chi^2$ | F-value | p-value      |
|--------|-------------|---------|----|----------|---------|--------------|
| Summer | Survival    | -0.328  | 1  | 4.943    | -       | <b>0.026</b> |
|        | Development | 0.000   | 1  | 0.007    | -       | 0.936        |
|        | Wing Length | 0.060   | 1  | 2.343    | -       | 0.126        |
|        | Growth      | -0.006  | 1  | 0.774    | -       | 0.379        |
|        | Body Inf    | -0.348  | 1  | 0.240    | -       | 0.624        |
|        | Head Inf    | -0.346  | 1  | 0.223    | -       | 0.637        |
|        | Sal Inf     | -0.488  | 1  | 0.580    | -       | 0.446        |
|        | VC          | -5.484  | 1  | -        | 2.275   | 0.175        |
| Fall   | Survival    | 0.368   | 1  | 7.441    | -       | <b>0.006</b> |
|        | Development | 0.002   | 1  | 2.554    | -       | 0.110        |
|        | Wing Length | 0.037   | 1  | 1.644    | -       | 0.200        |
|        | Growth      | 0.011   | 1  | 1.717    | -       | 0.190        |
|        | Body Inf    | -0.211  | 1  | 0.378    | -       | 0.539        |
|        | Head Inf    | -0.346  | 1  | 1.032    | -       | 0.310        |
|        | Sal Inf     | -0.932  | 1  | 1.276    | -       | 0.259        |
|        | VC          | 0.295   | 1  | -        | 2.173   | 0.184        |

**Table S2. Additional variation in residuals explained by temperature.** Model results from fitting temperature to residuals of original models (land class x season) for each response variable. In all models, temperature did not explain any additional variation, as evidenced by low mean sum of squares and F-statistics.

|             | df | Mean Sq | F value |
|-------------|----|---------|---------|
| Survival    | 1  | 1.948   | 0.302   |
| Development | 1  | 0.000   | 0.324   |
| Wing Length | 1  | 0.002   | 0.055   |
| Growth      | 1  | 0.000   | 0.000   |
| Body Inf    | 1  | 0.795   | 0.617   |
| Head Inf    | 1  | 0.156   | 0.124   |
| Sal Inf     | 1  | 0.079   | 0.132   |
| VC          | 1  | 0.031   | 0.006   |
