# Supplementary material for: Carry-over effects of urban larval environments on the transmission potential of dengue-2 virus
Source: PubMed Central journal article supplement (PMC6050736; doi:10.1186/s13071-018-3013-3), 2018-07-17

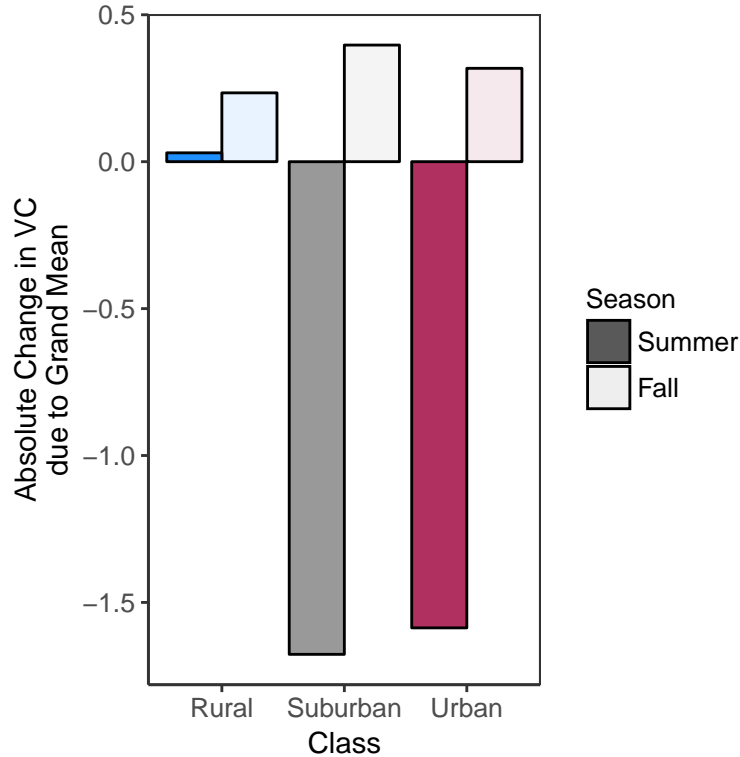

Supplement: 13071_2018_3013_MOESM2_ESM.pdf [file 13071_2018_3013_MOESM2_ESM.pdf]
